# Supplementary material for: Colorimetric sensor based on cotton thread for the quantification of ascorbic acid using Prussian blue and digital image detection
Source: Royal Society of Chemistry journal article supplement (doi:10.1039/d5ay01613d), 2025-12-03
Supplement: d5ay01613d1.pdf [file d5ay01613d1.pdf]

**Supplementary material**

**Colorimetric sensor based on cotton thread for the quantification of  
ascorbic acid using Prussian Blue and digital image detection**

Josiane Lopes de Oliveira<sup>a</sup>, Davi Pinheiro Coelho<sup>a</sup>, Willian Toito Suarez<sup>a</sup>, João Paulo  
Barbosa de Almeida<sup>b</sup>, Tiago Almeida Silva<sup>a</sup> and Vagner Bezerra dos Santos<sup>b,\*</sup>

*<sup>a</sup>Department of Chemistry, Centre for Exact Sciences and Technology, 36570-900,  
Federal University of Viçosa - UFV, Viçosa, MG, Brazil*

*<sup>b</sup>Fundamental Chemistry Department, 50740-560, Federal University of Pernambuco -  
UFPE, Recife, PE, Brazil*

*\*E-mail: [vagner.bsantos@ufpe.br](mailto:vagner.bsantos@ufpe.br)*

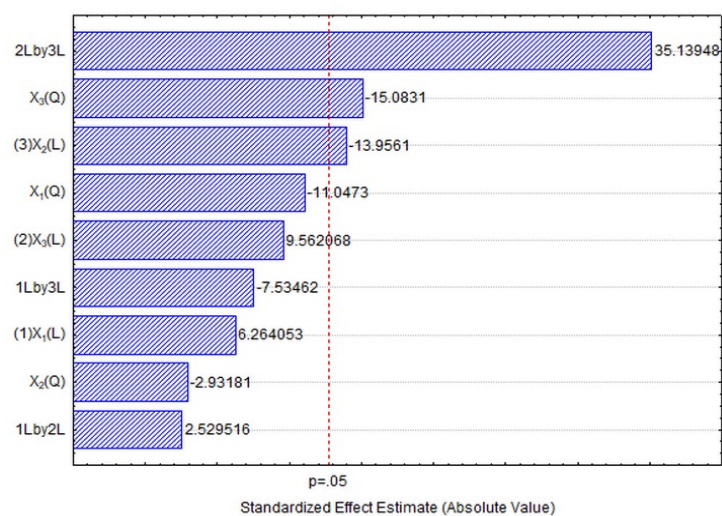

**Fig. S1.** Pareto chart of main effects for the central composite design. The red vertical line on the chart represents the p-value for the confidence level of 95%.

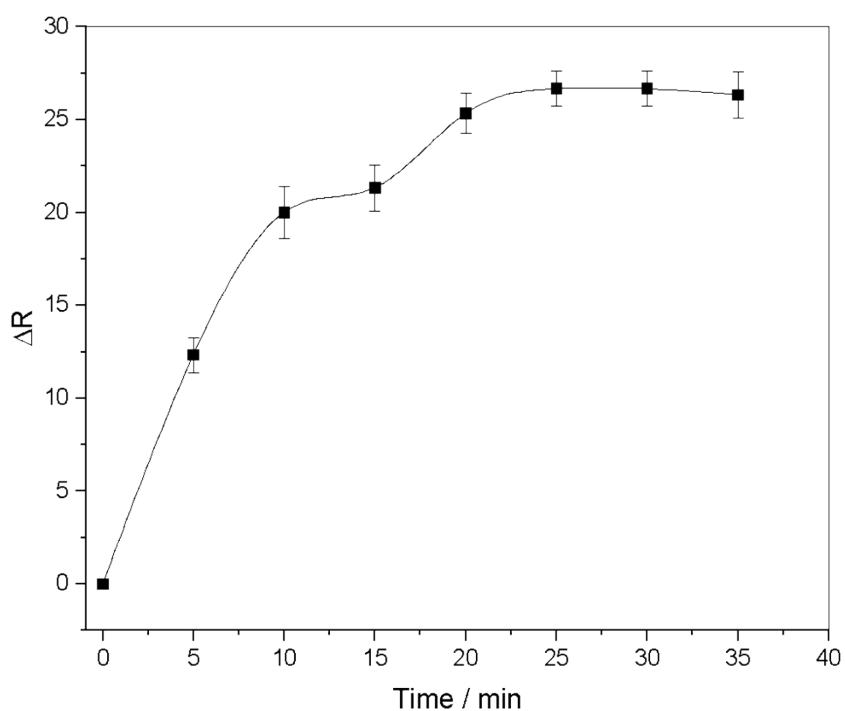

**Fig. S2.** Evaluation of the reaction time on the detection of L-AA (3 mg L<sup>-1</sup>). Experimental conditions:  $\mu$ TAD functionalized with  $K_4[Fe(CN)_6]$  (0.7  $\mu$ L, 1.0 mmol L<sup>-1</sup>) and Fe(III) (0.6  $\mu$ L, 0.8 mmol L<sup>-1</sup>).

### Thermogravimetric analysis

The thermal stability of the sensor was evaluated through TG (black) and DTG (blue) curves, illustrated in Fig. S3. As evidenced, the thermal analysis of the developed sensor, conducted under an inert atmosphere, highlights its remarkable thermal stability up to a temperature of 270 °C. In the first stage, the mass loss of approximately 5% was attributed to the volatilization of water molecules adsorbed in the cotton fiber. In a second stage (270 – 390 °C), the decomposition of the organic material, mainly by production of CO<sub>2</sub> was observed. This loss of mass was due to the matrix of cotton fibers of the  $\mu$ TAD leading to a maximum mass loss of 83%. This result demonstrates the good thermal stability of the proposed sensor.

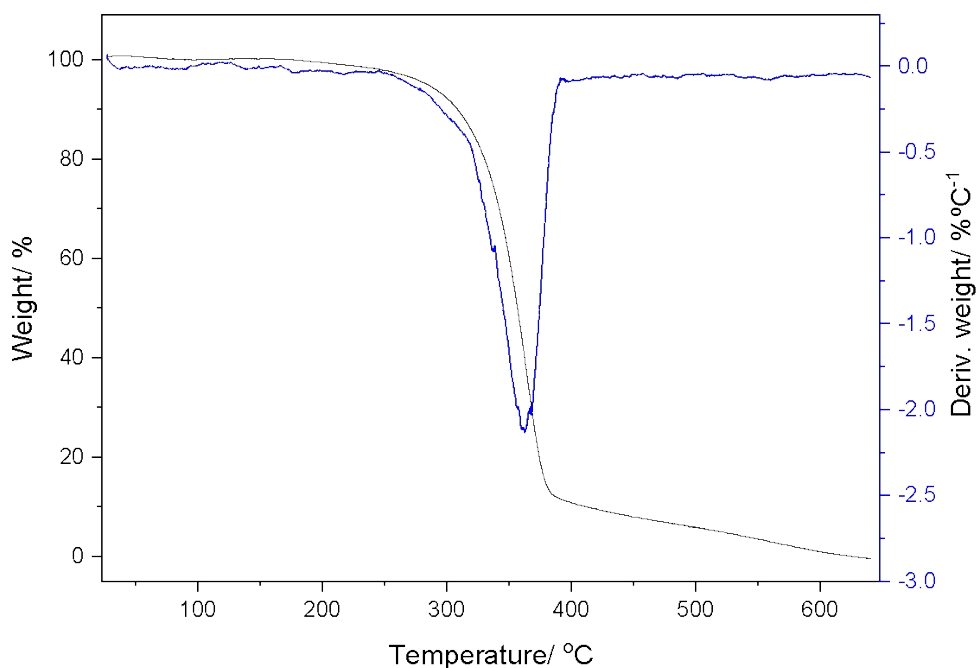

**Fig. S3.** TG/DTG curves related to the thermal decomposition of the designed  $\mu$ TAD. Experimental conditions:  $\mu$ TAD functionalized with K<sub>4</sub>[Fe(CN)<sub>6</sub>] (0.7  $\mu$ L, 1.0 mmol L<sup>-1</sup>) and Fe(III) (0.6  $\mu$ L, 0.8 mmol L<sup>-1</sup>).

**Table S1.** Principles used by the metric system of the AGREEN analytical calculator.

| Principles | Criterion                                       |
|------------|-------------------------------------------------|
| 1          | Sample handling                                 |
| 2          | Minimum sample size and number                  |
| 3          | In situ analysis                                |
| 4          | Low-energy operations and reduced reagent count |
| 5          | Automated and miniaturized method               |
| 6          | No derivatization                               |
| 7          | Low generation of analytical waste              |
| 8          | Multi-analytical or multi-parameter method      |
| 9          | Minimal energy use                              |
| 10         | Reagents obtained from renewable sources        |
| 11         | No toxic reagents                               |
| 12         | Increased operator safety                       |
